# Supplementary material for: Locus-specific analysis of Transposable Elements during the progression of ALS in the SOD1G93A mouse model
Source: PubMed Central journal article supplement (PMC8494334; doi:10.1371/journal.pone.0258291), 2021-10-06

## A DE TEs locus distribution

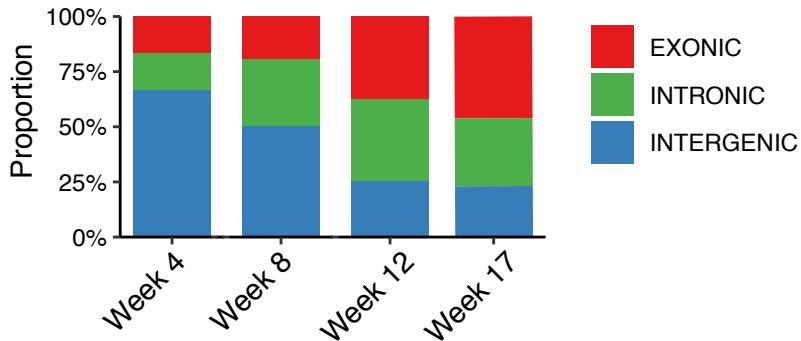

## B DE TEs class distribution

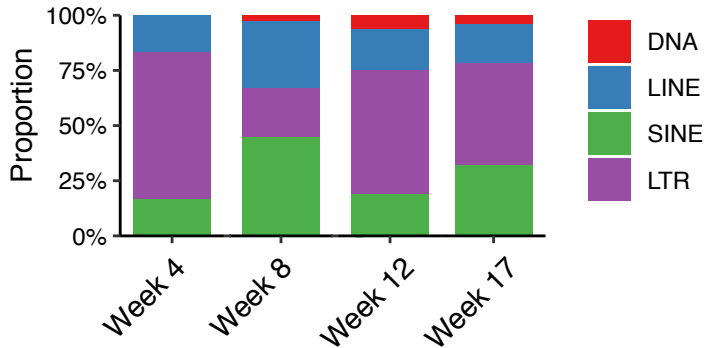

Supplement: pone.0258291.s002.pdf [file pone.0258291.s002.pdf]
